# Supplementary material for: Predictive modeling of plant messenger RNA polyadenylation sites
Source: PubMed Central journal article supplement (PMC1805453; doi:10.1186/1471-2105-8-43), 2007-02-07
Supplement: 1471-2105-8-43-S1.pdf [file 1471-2105-8-43-S1.pdf]

## Forward-backward Algorithm of GHMM Used in PASS

### ● Definition of parameters

- 1) N: number of states in the model
- 2) M: number of symbols can be observed at each state
- 3)  $V = \{v_1, v_2, \dots, v_M\}$ : set of observable discrete symbols
- 4)  $B = \{b_j(k)\}$ : probability distribution of each observable symbols at state  $S_j$
- 5)  $b_j(k) = P(v_k \text{ at } t | q_t = S_j)$ ,  $1 \leq j \leq N$ ,  $1 \leq k \leq M$
- 6)  $\pi = \{\pi_i\}$ : initial distribution of state  
 $\pi_i = P(q_1 = S_i)$
- 7) T: length of observed sequence
- 8)  $S = \{S_1, S_2, \dots, S_N\}$ : number of states in the model. Unlike HMM, GHMM uses  $q_r$  to express it's in the state of No. r.
- 9)  $A = \{a_{ij}\}$ : the probability from state  $S_i$  transferring to  $S_j$   
 $a_{ij} = P[q_{r+1} = S_j | q_r = S_i]$ ,  $1 \leq i, j \leq N$ . and  $a_{ii} = 0$ ,  $1 \leq i \leq N$
- 10)  $D = \{D_i\}$ : the largest sustained time in the state  $S_i$ ,  $1 \leq i \leq N$
- 11)  $P = \{p_i(d)\}$ : the probability of the sustained time to be d in the state  $S_i$ ,  
 $1 \leq i \leq N$ ,  $0 \leq d \leq D_i$

### ● Forward algorithm

Based on the definition of GHMM, in an observed sequence  $O = O_1 O_2 \dots O_T$ , suppose the first state starts from  $t=1$ ; last state ends at  $t=T$ ; and before the moment t there are r states:  $q_1, q_2, \dots, q_r$ . The sustained length of each state are  $d_1, d_2, \dots, d_r$ , and  $\sum_{s=1}^r d_s = t$ . Then define the forward variable  $\alpha_t(i)$  as below:

$$\alpha_t(i) = P(O_1 O_2 \dots O_t, S_i \text{ ends at } t | \lambda)$$

In a specific model  $\lambda$ ,  $\alpha_t(i)$  means the probability of having observed sequence  $O_1 O_2 \dots O_t$  at the moment  $t$  when state  $i$  is ended.

Detailed algorithm is described as below:

Since the model can only start from the first state, the initiation formula is :

$$\alpha_t(1) = \pi_1 p_1(t) \prod_{s=1}^t b_1(O_s) \quad 1 \leq t \leq T$$

$$\alpha_1(i) = 0 \quad 2 \leq i \leq N$$

The background states have the odd state number. Since length of the signal state cannot be 0, so we only consider the probability that transferred from previous state.

The modified algorithm is:

$$\alpha_t(j) = \sum_{d=1}^{\min(D_j, t-1)} [\alpha_{t-d}(j-1) p_j(d) \prod_{s=t-d+1}^t b_j(O_s)]$$

$2 \leq t \leq T, 2 \leq j \leq N \text{ and } j \bmod 2 = 1$

The signal states have the even state number. Since the length of signal state is fixed and that of the background state can be 0, we need to consider probability that transferred from previous background state and the one before it. The modified algorithm is:

$$\alpha_t(j) =$$

$$\left\{ \begin{array}{l} \alpha_{t-d}(j-1) p_j(d) \prod_{s=t-d+1}^t b_j(O_s) \\ \quad 2 \leq t \leq T, j = 2 \text{ with } \_ \text{fixed} \_ d \_ \text{value} \\ \alpha_{t-d}(j-2) p_{j-1}(0) p_j(d) \prod_{s=t-d+1}^t b_j(O_s) + \\ \alpha_{t-d}(j-1) p_j(d) \prod_{s=t-d+1}^t b_j(O_s) \\ \quad 2 \leq t \leq T, 3 \leq j \leq N, j \bmod 2 = 0 \text{ with } \_ \text{fixed} \_ d \_ \text{value} \end{array} \right.$$

Moreover, since the model can only end at the last background state, GHMM model only consider the probability of observed value  $O$  at moment  $T$  in the last state  $N$ . The stopping algorithm is:

$$P(O|\lambda) = \alpha_T(N)$$

● **Backward algorithm**

Based on same reason, in backward algorithm, define backward variable  $\beta_t(i)$  to

$$P(O_t \dots O_T \mid S_i \text{ begins at } t, \lambda)$$

In a specific model  $\lambda$ ,  $\beta_t(i)$  means the probability of having observed sequence  $O_t \dots O_T$  at the moment  $t$  when the model ends at state  $i$ .

The algorithm is listed below:

Since the model can only stop at the last state, the initiation formula is set to be:

$$\beta_t(N) = p_N(T-t+1) \prod_{s=t}^T b_N(O_s) \quad 1 \leq t \leq T$$

$$\beta_T(i) = 0 \quad 1 \leq i \leq N-1$$

The background states have the odd state number. Since signal state cannot be 0, so we only consider the probability that transferred from previous state. The modified algorithm is:

$$\beta_t(j) = \sum_{d=1}^{\min(D_j, T-t)} \left[ \prod_{s=t}^{t+d-1} b_j(O_s) p_j(d) \beta_{t+d}(j+1) \right]$$

$1 \leq t \leq T-1, \quad 1 \leq j \leq N-1 \text{ and } j \bmod 2 = 1$

The signal states have the even state number. Since the length of signal state is fixed and the background state can be 0, we need to consider probability that transferred from previous background state and the one before it. The modified algorithm is:

$$\beta_t(j) =$$

$$\left\{ \begin{array}{l} p_j(d) \prod_{s=t}^{t+d-1} b_j(O_s) \beta_{t+d}(j+1) \\ \quad 1 \leq t \leq T-1, \quad j = N-1 \text{ with } \underline{\text{fixed}} \underline{\text{dvalue}} \\ p_j(d) \prod_{s=t}^{t+d-1} b_j(O_s) p_{j+1}(0) \beta_{t+d}(j+2) + p_j(d) \prod_{s=t}^{t+d-1} b_j(O_s) \beta_{t+d}(j+1) \\ \quad 1 \leq t \leq T-1, 1 \leq j \leq N-2, j \bmod 2 = 0 \text{ and } \underline{\text{dvalue}} \underline{\text{is}} \underline{\text{fixed}} \end{array} \right.$$

Moreover, since the model can only start at the first background state, GHMM model only consider the probability of observed value O at the first state. The

stopping algorithm is:

$$P(O|\lambda) = \beta_1(1)$$

Therefore, given a sequence  $O$  and model  $\lambda$ , the formula to calculate the probability of state  $i$  ending at the position  $t$  of sequence  $O$  is:

$$P(S_i \text{ ends at } t, S_{i+1} \text{ begins at } t+1 | O, \lambda) = \frac{\alpha_t(i)\beta_{t+1}(i+1)}{P(O|\lambda)}. \text{ Based on our model, the}$$

$$\text{probability of position } t \text{ to be poly(A) site is } \frac{\alpha_t(8)\beta_{t+1}(9)}{P(O|\lambda)}.$$
