# Supplementary material for: Predictive modeling of plant messenger RNA polyadenylation sites
Source: PubMed Central journal article supplement (PMC1805453; doi:10.1186/1471-2105-8-43), 2007-02-07
Supplement: 1471-2105-8-43-S2.pdf [file 1471-2105-8-43-S2.pdf]

**Additional file 2**

The distribution of nucleotides in the 20 nt region around poly(A) sites

| Position | -10   | -9    | -8    | -7    | -6    | -5    | -4    | -3    | -2    | -1    |
|----------|-------|-------|-------|-------|-------|-------|-------|-------|-------|-------|
| A        | 0.229 | 0.207 | 0.203 | 0.201 | 0.222 | 0.229 | 0.235 | 0.153 | 0.059 | 0.733 |
| T        | 0.485 | 0.531 | 0.550 | 0.523 | 0.468 | 0.452 | 0.411 | 0.490 | 0.488 | 0.163 |
| C        | 0.136 | 0.122 | 0.122 | 0.139 | 0.151 | 0.151 | 0.194 | 0.217 | 0.313 | 0.060 |
| G        | 0.149 | 0.140 | 0.125 | 0.137 | 0.159 | 0.168 | 0.161 | 0.140 | 0.140 | 0.044 |
| Position | 1     | 2     | 3     | 4     | 5     | 6     | 7     | 8     | 9     | 10    |
| A        | 0.469 | 0.306 | 0.280 | 0.286 | 0.251 | 0.263 | 0.247 | 0.228 | 0.216 | 0.225 |
| T        | 0.342 | 0.434 | 0.410 | 0.394 | 0.413 | 0.406 | 0.410 | 0.431 | 0.433 | 0.429 |
| C        | 0.108 | 0.138 | 0.159 | 0.163 | 0.173 | 0.159 | 0.155 | 0.153 | 0.165 | 0.180 |
| G        | 0.081 | 0.122 | 0.151 | 0.157 | 0.163 | 0.171 | 0.188 | 0.188 | 0.186 | 0.166 |
