# Supplementary material for: Predictive modeling of plant messenger RNA polyadenylation sites
Source: PubMed Central journal article supplement (PMC1805453; doi:10.1186/1471-2105-8-43), 2007-02-07

**Additional file 3.** Analysis of the lengths of signal elements in FUE, NUE, CE-L and CE-R. Vertical value represents the length of the elements and the horizontal value represents the percentage of the difference between the actual number and the expected number.

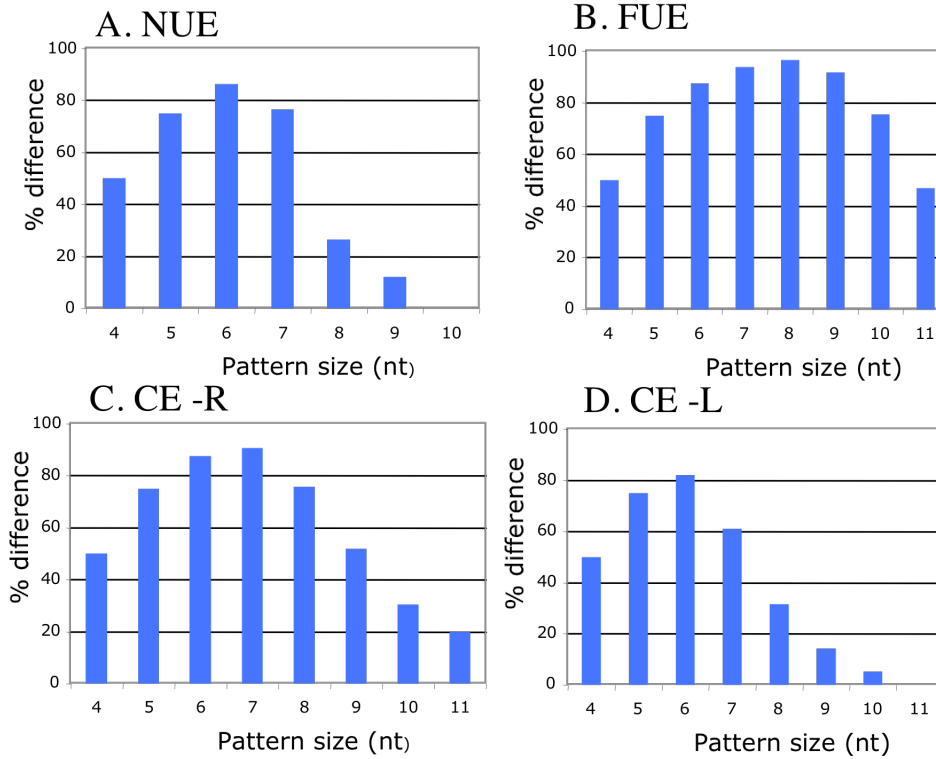

Supplement: 1471-2105-8-43-S3.pdf [file 1471-2105-8-43-S3.pdf]
