# Supplementary material for: Predictive modeling of plant messenger RNA polyadenylation sites
Source: PubMed Central journal article supplement (PMC1805453; doi:10.1186/1471-2105-8-43), 2007-02-07
Supplement: 1471-2105-8-43-S4.pdf [file 1471-2105-8-43-S4.pdf]

**Additional file 4:**

Frequency of eight nucleotides patterns with high counts in FUE

| NO 1-17  |       | NO 18-34 |       | NO 35-50 |       |
|----------|-------|----------|-------|----------|-------|
| Sequence | Count | Sequence | Count | Sequence | Count |
| tttgtttt | 1024  | tttttttc | 598   | tgtgtttt | 475   |
| ttttgttt | 1018  | ttttattt | 577   | gtttgttt | 472   |
| tttttttt | 987   | ttgttggt | 577   | ttttgggt | 464   |
| tttttggt | 862   | ttcttctt | 568   | ttttttta | 460   |
| tttttctt | 806   | gaagaaga | 559   | ttgtttgt | 460   |
| tttctttt | 773   | aagaagaa | 557   | tgtttctt | 457   |
| ttttcttt | 759   | tttatttt | 536   | tttgtggt | 449   |
| ttgttttt | 745   | agaagaag | 515   | tgttggtt | 440   |
| ttcttttt | 701   | tttgttgt | 513   | tttgtttc | 436   |
| tttttttg | 698   | tttgtttg | 502   | ttttgtgt | 434   |
| tgtttttt | 678   | ttgttttg | 500   | tttgattt | 434   |
| tttgggtt | 666   | tgttttgt | 494   | ttgtgttt | 428   |
| cttttttt | 652   | attttttt | 491   | tcttcttt | 427   |
| gttttttt | 634   | tgtttttg | 489   | tcttcttc | 425   |
| ttttttct | 624   | tttcttct | 488   | gtttttgt | 424   |
| ttttttgt | 615   | gttttggt | 487   | cttttggt | 420   |
| tctttttt | 606   | tgtttggt | 486   |          |       |
