# Supplementary material for: Predictive modeling of plant messenger RNA polyadenylation sites
Source: PubMed Central journal article supplement (PMC1805453; doi:10.1186/1471-2105-8-43), 2007-02-07
Supplement: 1471-2105-8-43-S5.pdf [file 1471-2105-8-43-S5.pdf]

**Additional file 5:**

Statistical features of the background

|     | Region (nt) | A ratio | T ratio | C ratio | G ratio |
|-----|-------------|---------|---------|---------|---------|
| Bg1 | -160 ~ -81  | 0.272   | 0.381   | 0.159   | 0.188   |
| Bg2 | -80 ~ -21   | 0.296   | 0.401   | 0.139   | 0.165   |
| Bg3 | -6 ~ -20    | 0.324   | 0.401   | 0.126   | 0.149   |
| Bg4 | -1 ~ -5     | 0.179   | 0.462   | 0.205   | 0.154   |
| Bg5 | +1 ~ +5     | 0.414   | 0.348   | 0.126   | 0.111   |
| Bg6 | +10 ~ +20   | 0.276   | 0.407   | 0.164   | 0.153   |
